# Supplementary material for: Influences of organic carbon speciation on hyporheic corridor biogeochemistry and microbial ecology
Source: PubMed Central journal article supplement (PMC5805721; doi:10.1038/s41467-018-02922-9), 2018-02-08
Supplement: 41467_2018_2922_MOESM3_ESM.pdf [file 41467_2018_2922_MOESM3_ESM.pdf]

## **Description of Additional Supplementary Files**

File Name: Supplementary Data 1

Description: Summary of biochemical transformation analyses inferred from FTICR-MS data using peaks unique to the river or hyporheic zone datasets.

File Name: Supplementary Data 2

Description: Summary of biochemical transformation analyses inferred from FTICR-MS data using all peaks in the river or hyporheic zone datasets.

File Name: Supplementary Data 3

Description: Aqueous data used in mixing model analyses, and Gibbs free energy analyses.
